# Supplementary material for: XBP1-KLF9 Axis Acts as a Molecular Rheostat to Control the Transition from Adaptive to Cytotoxic Unfolded Protein Response
Source: PubMed Central journal article supplement — Cell Rep. Author manuscript; Available in PMC 2018 Nov 23. (PMC6251307; doi:10.1016/j.celrep.2018.09.013), 2018-10-02
Supplement: NIHMS1509375-supplement-1.pdf [file NIHMS1509375-supplement-1.pdf]

Cell Reports, Volume 25

## Supplemental Information

### **XBP1-KLF9 Axis Acts as a Molecular Rheostat to Control the Transition from Adaptive to Cytotoxic Unfolded Protein Response**

**Emily E. Fink, Sudha Moparthy, Archis Bagati, Anna Bianchi-Smiraglia, Brittany C. Lipchick, David W. Wolff, Matthew V. Roll, Jianmin Wang, Song Liu, Andrei V. Bakin, Eugene S. Kandel, Ann-Hwee Lee, and Mikhail A. Nikiforov**

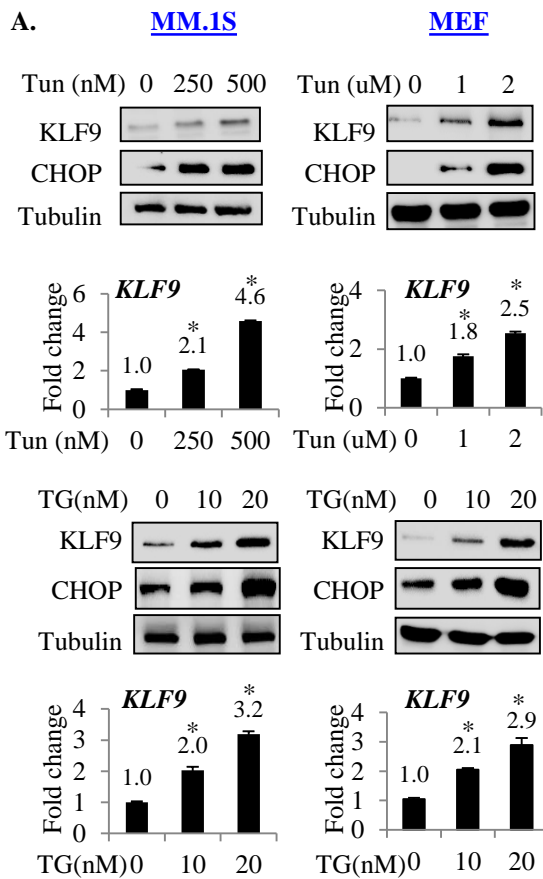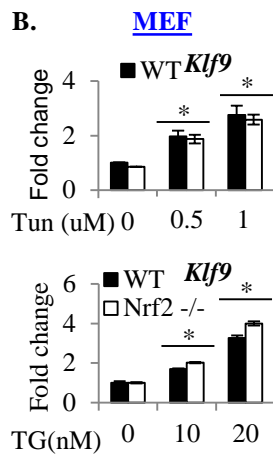

**Figure S1. ER stress induces expression of KLF9, Related to Figure 1**

**A.** Indicated cells were treated with indicated doses of tunicamycin (Tun) or thapsigargin (TG) for 24hrs and probed in Q-RT-PCR (upper panels, KLF9/ $\beta$ -actin signal ratios are shown) or immunoblotting with indicated antibodies. **B.** Wildtype (WT) or Nrf2<sup>-/-</sup> MEFs were treated with indicated doses of tunicamycin (tun) or thapsigargin (TG) for 24hrs and probed in Q-RT-PCR (upper panels, Klf9/ $\beta$ -actin signal ratios are shown). Representative images shown. All data represent mean  $\pm$  SEM of 2 or more biological replicates. Statistical significance was analyzed using two-tailed Student t-Test. A  $p < 0.05$  (\*) was considered significant.

WI38

HCT 116

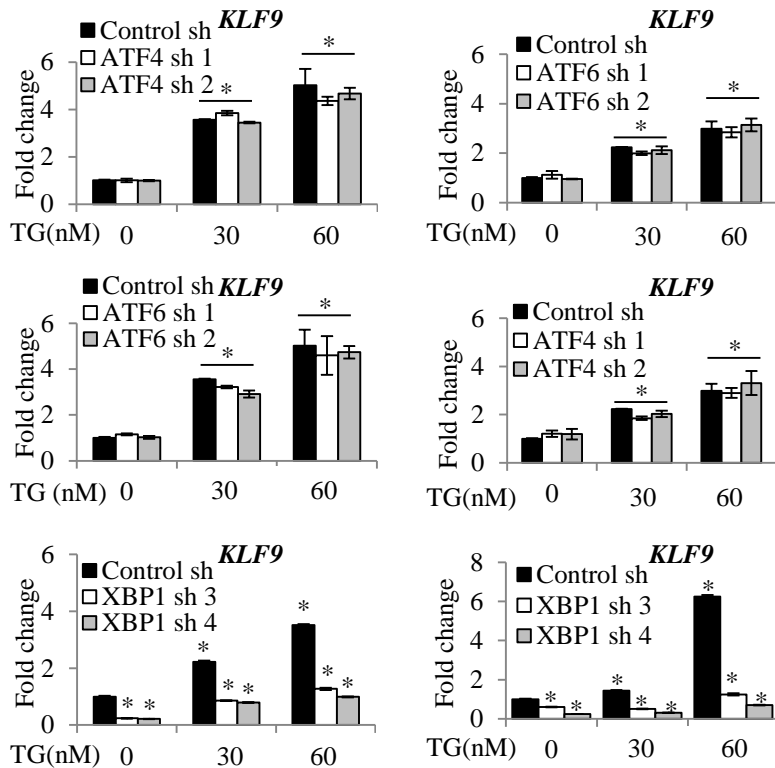

**Figure S2. KLF9 induction of ER stress depends on ER stress, Related to Figure 2**

Indicated cells transduced with control shRNA (Control sh) or shRNAs to indicated genes were treated with indicated doses of thapsigargin (TG) followed by Q-RT-PCR (KLF9/ $\beta$ -actin signal ratios are shown). All data represent mean  $\pm$  SEM of 2 or more biological replicates. Statistical significance was analyzed using two-tailed Student t-Test. A  $p < 0.05$  (\*) was considered significant.

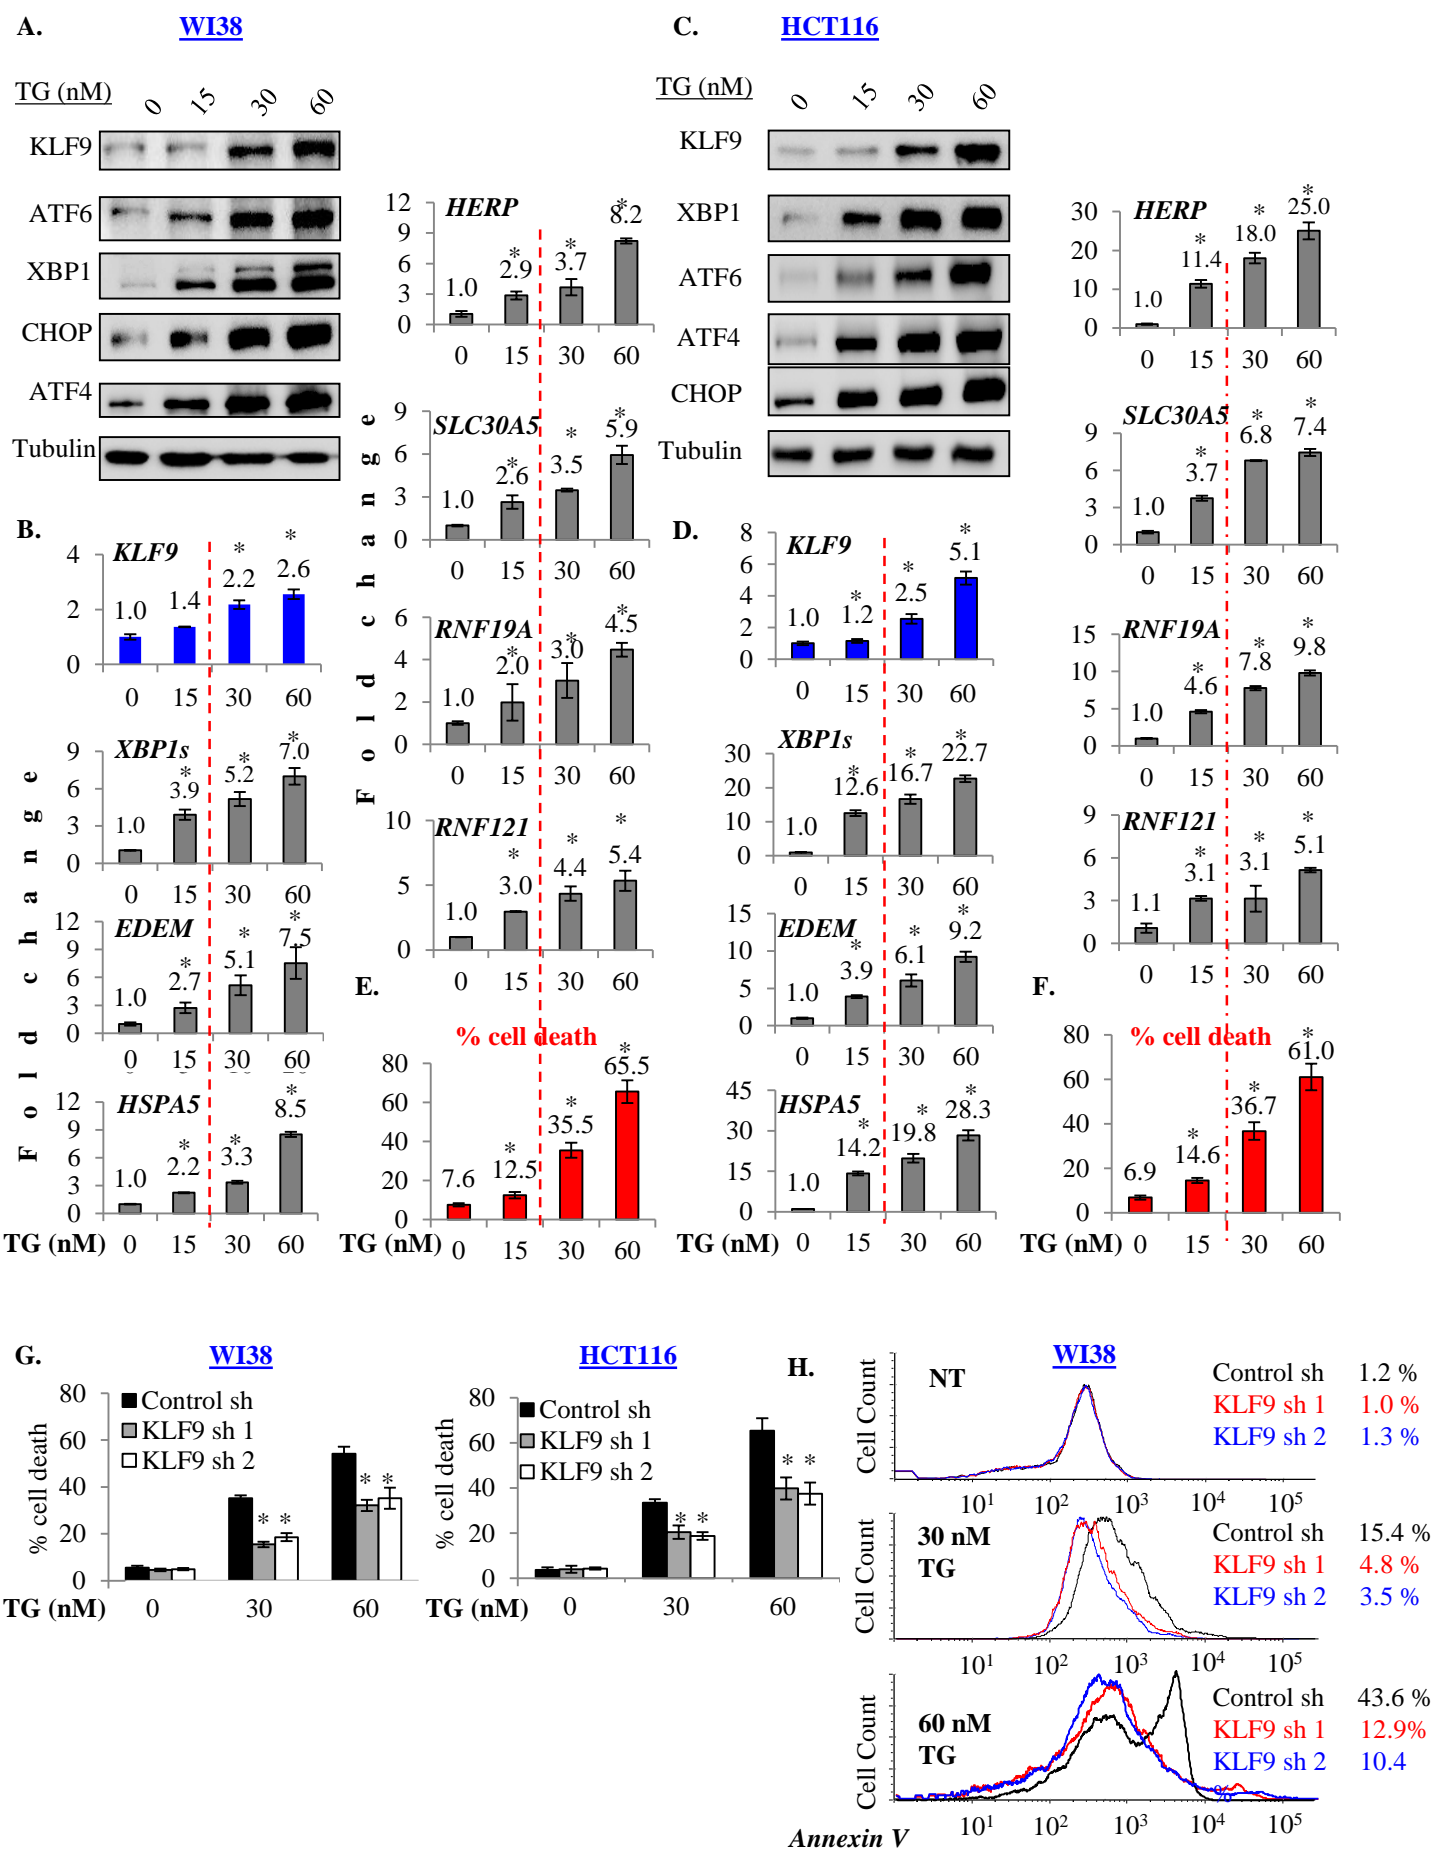

Figure S3

**Figure S3. KLF9 is upregulated by toxic doses of thapsigargin, Related to Figure 3**

Indicated cells treated with the indicated doses of thapsigargin (TG) for 24hrs were probed in immunoblotting with the indicated antibodies (**A, C**) or in Q-RT-PCR (shown are ratios of signal for an indicated gene and  $\beta$ -actin) (**B, D**). **E, F**. The viability of cells treated as in A or D was assessed *via* trypan blue viability assay. **G, H**. Cells were transduced with control shRNA (C1) or KLF9 shRNAs (sh1, sh2), treated with thapsigargin (Tg) for 48hrs and probed in trypan blue viability assay (G) or Annexin V apoptosis assay (H). Representative images shown. All data represent mean  $\pm$  SEM of 2 or more biological replicates. Statistical significance was analyzed using two-tailed Student t-Test. A  $p < 0.05$  (\*) was considered significant.

A.

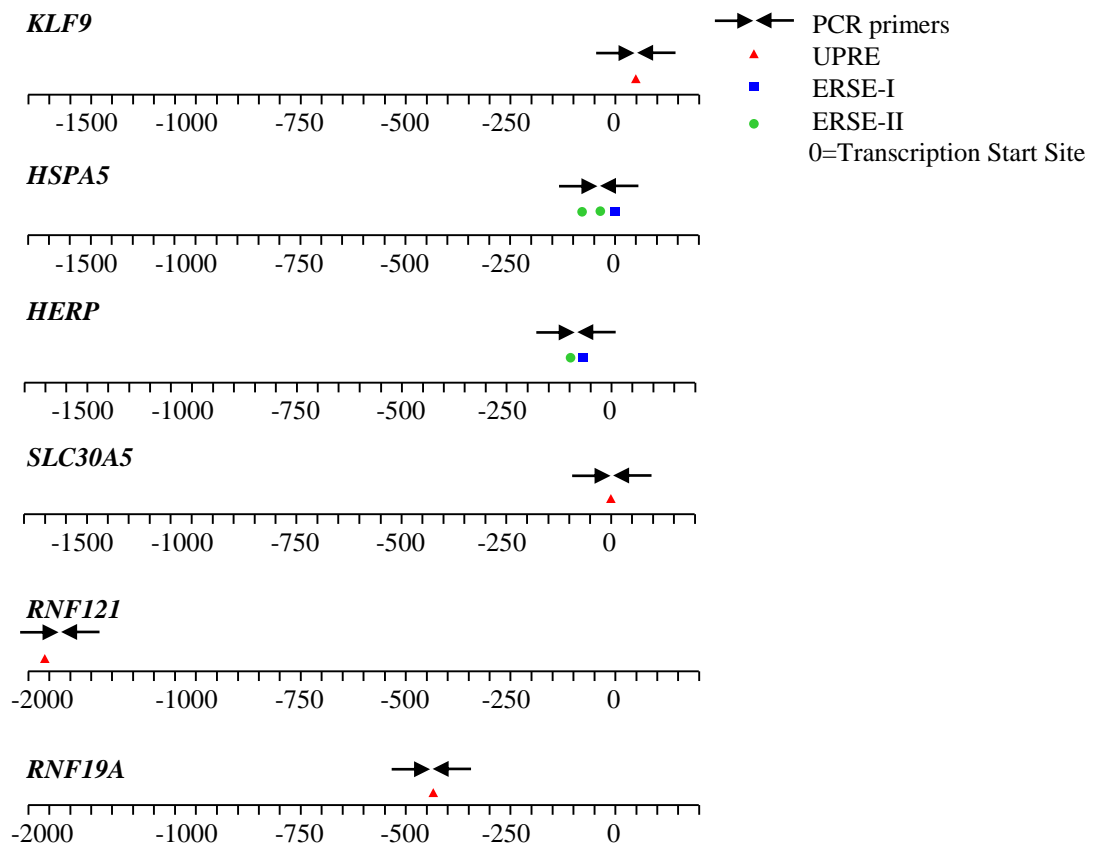

B.

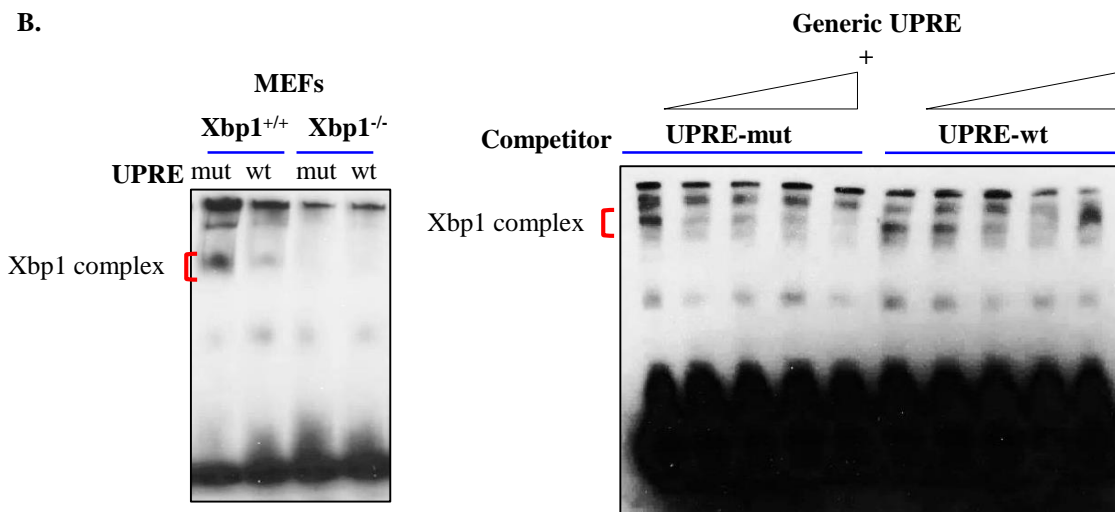

**Figure S4. XBP1s binding to *KLF9* promoter, Related to Figure 4**

**A.** Schematics representation of XBP1s binding sites in the promoter of studied genes. Arrows denote PCR primers used in ChIP assay. **B.** Full scale gel images corresponding to Figure 4E,F. Representative images shown.

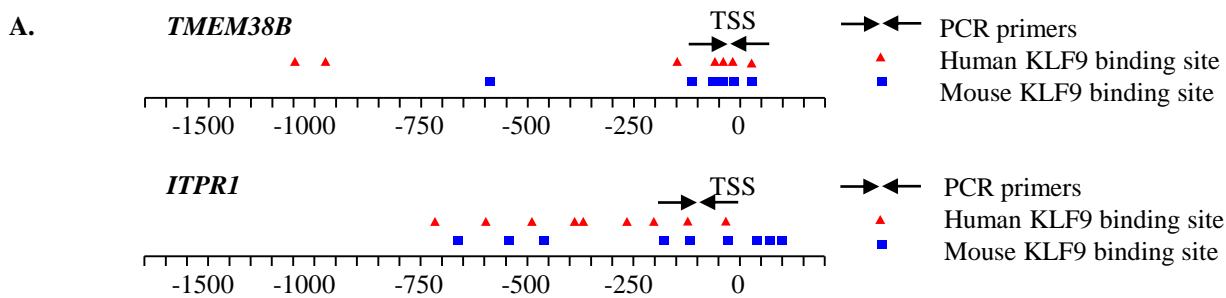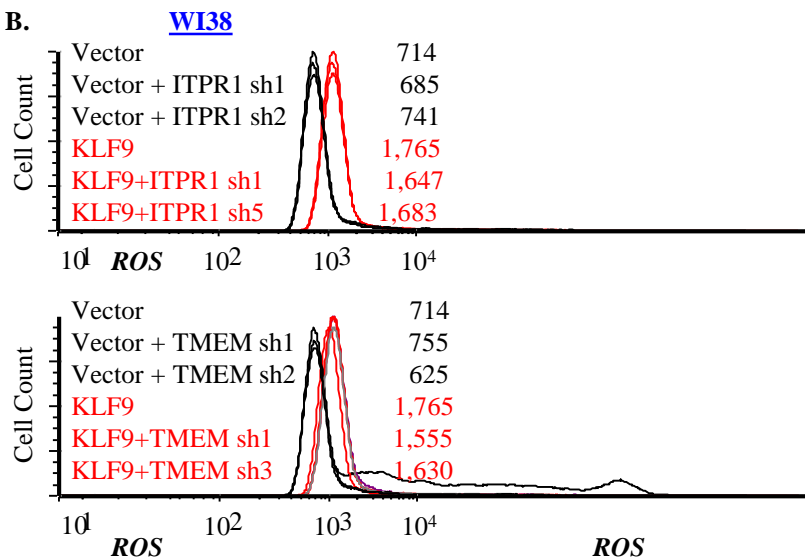

**Figure S5. *TMEM38B* and *ITPR1* are KLF9 targets, Related to Figure 5.**

**A.** Schematics representation of KLF9 binding sites in the promoter of indicated genes. Arrows denote PCR primers used in Q-PCR on DNAs obtained in ChIP assay. **B.** WI38 cells expressing the indicated constructs were probed in ROS-FACS analysis. Representative images shown.

Table S1. KLF9 depletion decreases ER-induced cell death, Related to Figure 3

| WI38         | % Cell Death |      |      |
|--------------|--------------|------|------|
| Tun. $\mu$ M | 0            | 1    | 2    |
| Control sh   | 5.5          | 35.2 | 54.2 |
| KLF9 sh1     | 4.6          | 15.4 | 32.1 |
| KLF9 sh2     | 4.9          | 18.5 | 35.2 |

| HCT116       | % Cell Death |      |      |
|--------------|--------------|------|------|
| Tun. $\mu$ M | 0            | 1    | 2    |
| Control sh   | 3.6          | 22.6 | 47.6 |
| KLF9 sh1     | 4            | 14.2 | 29.5 |
| KLF9 sh2     | 4.3          | 13.5 | 28.4 |



Table S2. ITPR1 and TMEM38B are direct KLF9 target genes, Related to Figure 5

| Genes oppositely regulated by KLF9 overexpression and depletion (RNA-Seq)                                                                                                                                                                                                                                                                                                                                                                 | Genes involved in regulation of ER biogenesis                                                         | Genes whose expression changed $\geq 2$ fold by KLF9 overexpression (Q-RT-PCR) | Genes interacting with KLF9 (ChIP assay) |
|-------------------------------------------------------------------------------------------------------------------------------------------------------------------------------------------------------------------------------------------------------------------------------------------------------------------------------------------------------------------------------------------------------------------------------------------|-------------------------------------------------------------------------------------------------------|--------------------------------------------------------------------------------|------------------------------------------|
| AADAC<br>AMFR<br>ASPHD1<br>ATP2A1<br>BSCL2<br>CCND1<br>CD48<br>CDS1<br>COL4A3BP<br>CYP26A1<br>CYP39A1<br>CYP4F2<br>DEGS2<br>DERL3<br>DUOXA1<br>EDA<br>EGR1<br>EIF2AK2<br>ERN1<br>ERP27<br>EXTL1<br>FAM129A<br>FOS<br>HLA-DOB<br>HLA-DRA<br>HSD11B1<br>HSPA6<br>HSPB2<br>HSPB3<br>ITPR1<br>JPH1<br>JPH4<br>JSRP1<br>LRMP<br>MLANA<br>NR4A2<br>OLFM1<br>P4HA3<br>PPP1R15A<br>PTGS2<br>RYR1<br>SCAMP5<br>SDF2L1<br>SOAT2<br>TMEM38B<br>TRAM2 | AMFR<br>ATP2A1<br>BSCL2<br>EIF2AK2<br>ERN1<br>ITPR1<br>JPH4<br>PPP1R15A<br>SDF2L1<br>TMEM38B<br>TRAM2 | ATP2A1<br>ITPR1<br>PPP1R15A<br>SDF2L1<br>TMEM38B<br>TRAM2                      | ITPR1<br>TMEM38B                         |

Table S3. TMEM38B depletion decreases ER-induced cell death, Related to Figure 5

|              | % Cell Death |      |      |
|--------------|--------------|------|------|
| Tun. $\mu$ M | 0            | 1    | 2    |
| Control sh   | 2.9          | 32.7 | 46   |
| TM sh1       | 3.5          | 19.8 | 32   |
| TMsh2        | 3.8          | 22.6 | 30.2 |

Table S4. PCR primers and probes, Related to STAR Methods

| <b>Q-RT-PCR primers</b> |                            |
|-------------------------|----------------------------|
| <b>Name</b>             | <b>Sequence 5'-3'</b>      |
| Hs_CHOP L               | AGAACCAGGAAACGGAAACAGA     |
| Hs_CHOP R               | TCTCCTTCATGCGCTGCTTT       |
| Hs_EDEM L               | CAAGTGTGGGTACGCCACG        |
| Hs_EDEM R               | AAAGAAGCTCTCCATCCGGTC      |
| Hs_HSPA5 L              | TGTTCAACCAATTATCAGCAAACCTC |
| Hs_HSPA5 R              | TTCTGCTGTATCCTCTTCACCAGT   |
| Hs_HERP L               | TTCTGGGAAGCTGTTGTTGG       |
| Hs_HERP R               | TCACATTGCACACCAGATGC       |
| Hs_SLC30A5 L            | ATCACACCAATGCTGCCAAG       |
| Hs_SLC30A5 R            | TGATCACAGCCATTACACC        |
| Hs_RNF19A L             | ATGCCAGCACCAAAGCAATG       |
| Hs_RNF19A R             | TGTGCCTGAATTTGGATGGC       |
| Hs_RNF121 L             | TTCAGACAGTGTGTGTGCTG       |
| Hs_RNF121 R             | TTGCTTCTTTCCACGATGC        |
| Hs_DNAJB9 L             | TCGGAGGGTGCAGGATATTAG      |
| Hs_DNAJB9 R             | CGCTCTGATGCCGATTTTGG       |
| Hs_XBP1s L              | CTGAGTCCGAATCAGGTGCAG      |
| Hs_XBP1s R              | ATCCATGGGGAGATGTTCTGG      |
| Mm_Edem L               | TTTTGAGTGGGTTGCCAGAC       |
| Mm_Edem R               | TCTGCTTTCCAACCAATGG        |
| Mm_Hspa5 L              | TCGGGCCAAATTTGAAGAGC       |
| Mm_Hspa5 R              | CAACACTTTCTGGACAGGCTTC     |
| Mm_Tmem38b L            | TGCCATGCTCCATTGCTTTG       |
| Mm_Tmem38b R            | ACTAGGTCACGAGGGCAAAG       |
| Mm_Itp1 L               | AAACCACGTGCTTCATCTGC       |
| Mm_Itp1 R               | TTTCACCAGCACGATGAAGC       |
| <b>TaqMan Probes</b>    |                            |
| <b>Name</b>             | <b>Cat #</b>               |
| Hs_KLF9                 | Hs00230918_m1              |
| Hs_B-Actin              | Hs99999903_m1              |
| Hs_TMEM38B              | Hs00216531_m1              |
| Hs_ITPR1                | Hs00181881_m1              |
| Hs_XBP1s                | Hs00231936_m1              |
| Mm_Klf9                 | Mm00495172_m1              |
| Mm_b-actin              | Mm00607939_s1              |
| <b>ChIP primers</b>     |                            |
| <b>Name</b>             | <b>Sequence 5'-3'</b>      |
| Hs_KLF9 promoter L      | AAACGGAACAGTCGGATTGG       |
| Hs_KLF9 promoter R      | TCACGTCACAAACCAACCC        |
| Hs_ITPR1 promoter L 1   | GGTTTCTCGTGCAAACCCGA       |
| Hs_ITPR1 promoter R 1   | CCCCCTTCCCTGGAATCCA        |
| Hs_ITPR1 promoter L 2   | CGGCCCCAGTGACACCTG         |

|                        |                                  |
|------------------------|----------------------------------|
| Hs_ITPR1 promoter R 2  | GGCTGGGCCCTAAATAGACG             |
| Hs_TM38B promoter L 1  | GTGACTTGCACTGTGGTTGC             |
| Hs_TM38B promoter R 1  | AGGAGTAGGAGAGGGCACAG             |
| Hs_TM38B promoter L 2  | AACTCTGAGCGTCTCCCCTT             |
| Hs_TM38B promoter R 2  | GTGAGGAGTAGGAGAGGGCA             |
| Hs_HSPA5 promoter L    | GGAGCAGTGACGTTTATTGCG            |
| Hs_HSPA5 promoter R    | TCGTTGGAGGCCGTTTCATTG            |
| Hs_HERP promoter L     | CGATTGGGCCACGTTGGG               |
| Hs_HERP promoter R     | GCTTCGGGCGCCTTTTATAG             |
| Hs_SLC30A5 promoter L  | AGCTTCAATGCGACACAACG             |
| Hs_SLC30A5 promoter R  | TTGCCAAGCCACGTCATCAG             |
| Hs_SDF2L1 promoter L   | AGCGATCCAACAACCTCAAG             |
| Hs_SDF2L1 promoter R   | GCGTGAACAGTTGGTGAAGA             |
| Hs_TRAM2 promoter L    | GCGTCTTACCAACTGTTTAC             |
| Hs_TRAM2 promoter R    | TTTGATTGGTCCACGCTTCC             |
| Hs_PPP1R15A promoter L | TGAGGCAGGAGAATCGCTTG             |
| Hs_PPP1R15A promoter R | TTTGAGGCGGAGTTTTGCTC             |
| Hs_ATP2A1 promoter L   | GCAACAACCTGTGGCTTTGC             |
| Hs_ATP2A1 promoter R   | AAAGGGAGCAGAGACACAGAG            |
| Hs_RNF121 promoter L   | AGCATTTTGGGAGGTTGACG             |
| Hs_RNF121 promoter R   | CAGGGTTTACCATGTTGGC              |
| Hs_RNF19a promoter L   | AAGCTGGTTGTTTCCGAAGC             |
| Hs_RNF19a promoter R   | TGGCTCTTGTCTGGCATCAG             |
| <b>EMSA Probes</b>     |                                  |
| <b>Name</b>            | <b>Sequence 5'-3'</b>            |
| UPRE L (Btn lable)     | GGTCGAGACAGGTGCTGACGTGGCGATTCCCC |
| UPRE R (Btn lable)     | GGGGAATCGCCACGTCAGCACCTGTCTCGACC |
| KLF9 WT L (Btn lable)  | AGGGGGTTTGGTTTGTGACGTGATGGGATTCT |
| KLF9 WT R (Btn lable)  | AGAATCCCATCACGTCACAAACCAAACCCCT  |
| KLF9 Mut L (Btn lable) | AGGGGGTTTGGTTTGTGACGTGGTGGGATTCT |
| KLF9 Mut R (Btn lable) | AGAATCCCACCACGTCACAAACCAAACCCCT  |
| UPRE L (unlabeled)     | GGTCGAGACAGGTGCTGACGTGGCGATTCCCC |
| UPRE R (unlabeled)     | GGGGAATCGCCACGTCAGCACCTGTCTCGACC |
| KLF9 WT L (unlabeled)  | AGGGGGTTTGGTTTGTGACGTGATGGGATTCT |
| KLF9 WT R (unlabeled)  | AGAATCCCATCACGTCACAAACCAAACCCCT  |
| KLF9 Mut L (unlabeled) | AGGGGGTTTGGTTTGTGACGTGGTGGGATTCT |
| KLF9 Mut R (unlabeled) | AGAATCCCACCACGTCACAAACCAAACCCCT  |
